# Supplementary material
Source: publisher figshare collection journal article supplement (https://acs.figshare.com/ndownloader/files/4778917)
Supplement: Supplementary file 1 [file 4778917]

## SUPPORTING INFORMATION

### Modulation of the Morphology of ZnO Nanostructures via Aminolytic Reaction: from Nanorods to Nanosquamas

Zhihua Zhang, Shuhua Liu, Shueyin Chow, and Ming-Yong Han\*

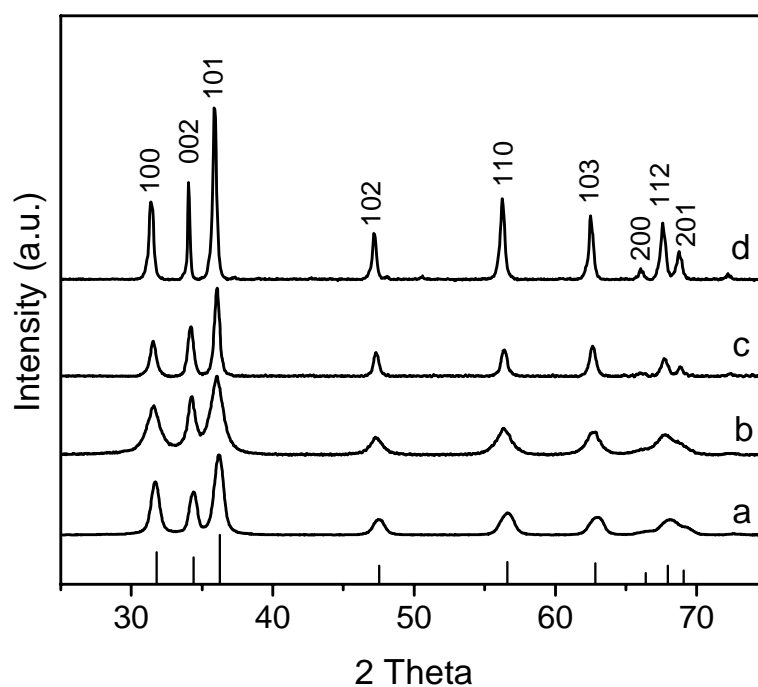

**Figure 1s.** XRD patterns of various morphology-modulated ZnO nanostructures including (a) nanodumbbells, (b) nanotetrahedrons, (c) nanosquamas, and (d) nanorods, which are consistent with that of wurtzite-structured ZnO.

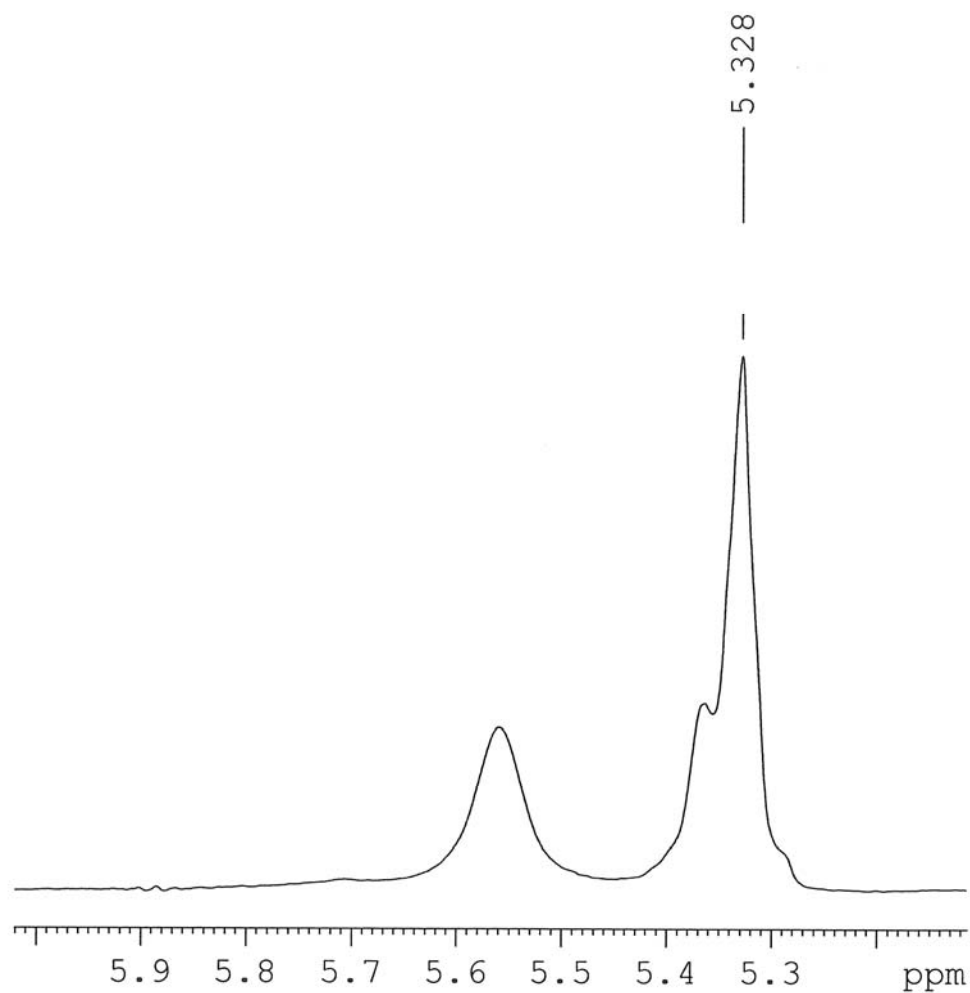

**Figure 2s.**  $^1\text{H}$  NMR spectrum of the reaction residue of zinc acetate (1 mmol) with oleylamine (2 mmol) at 240 °C in dioctyl ether after 30 min reaction.
